# Supplementary figures and images for: A Novel Role for Corneal Pachymetry in Planning Cataract Surgery by Determining Changes in Spherical Equivalent Resulting from a Previous LASIK Treatment
Source: Hindawi journal article supplement (doi:10.1155/2023/2261831), 2023-01-01

**Ablation spherical equivalent (Dioptres)**

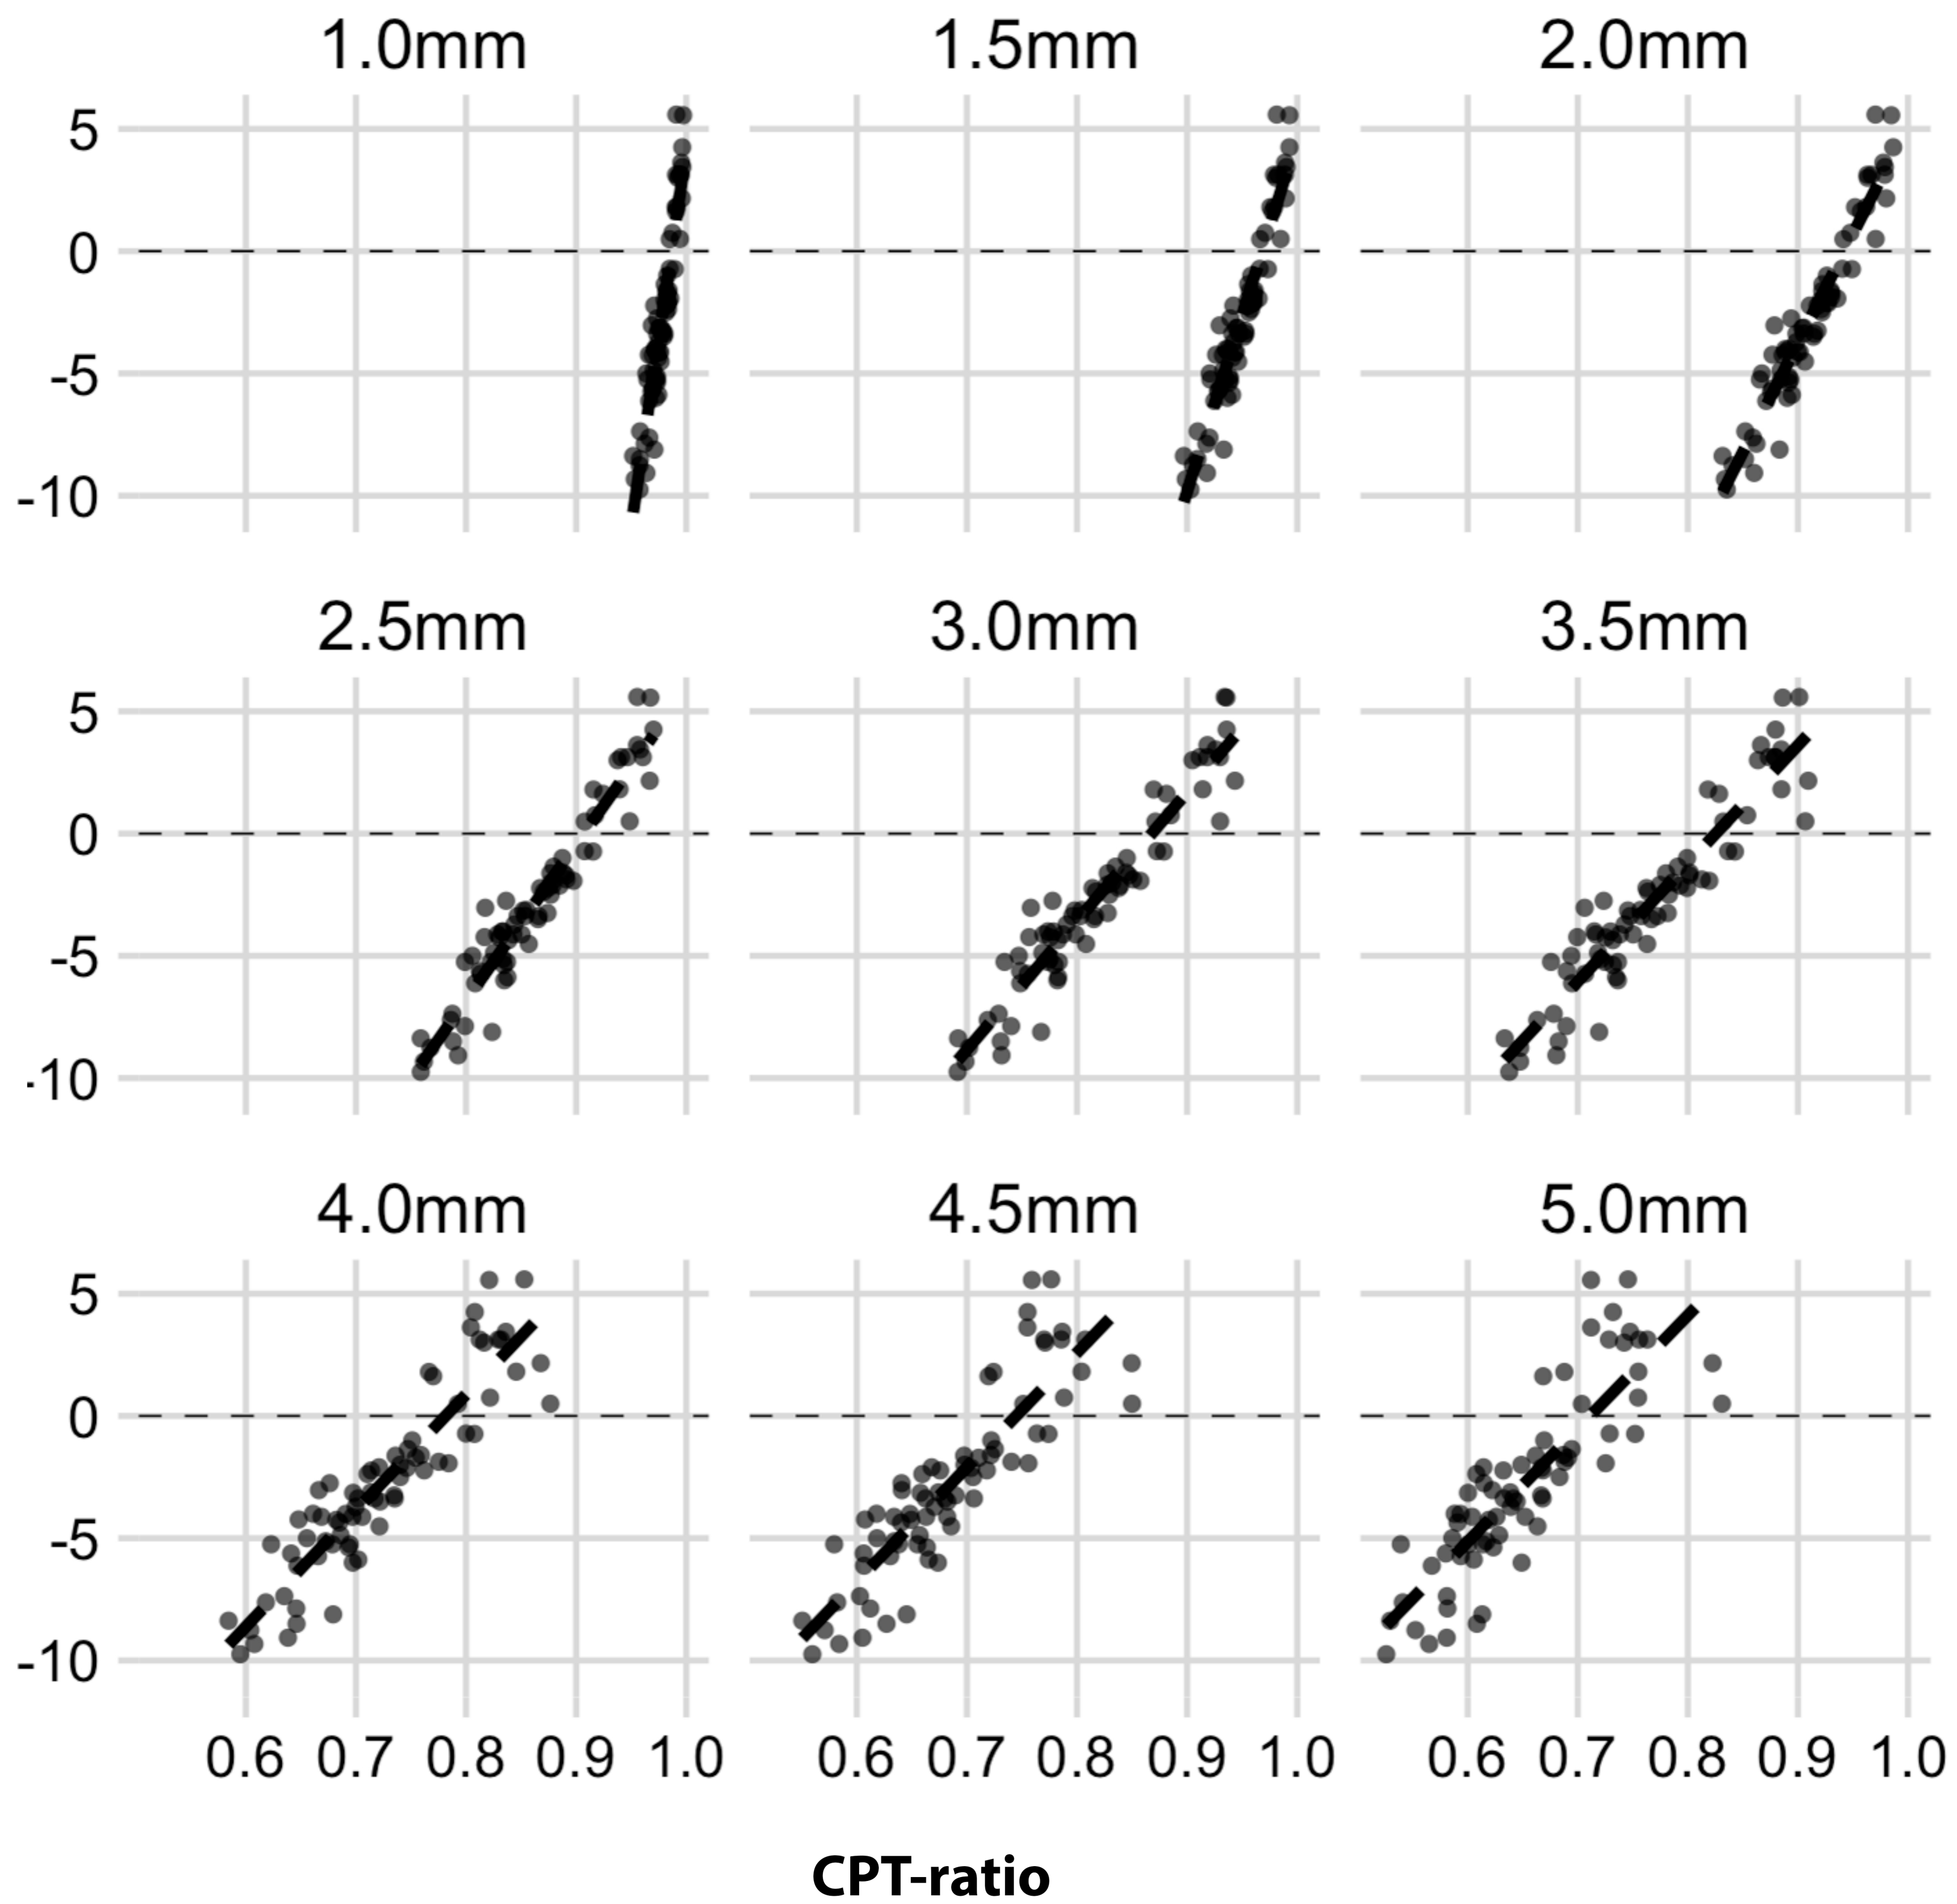

Supplement: f1 [file 2261831.f1.zip]

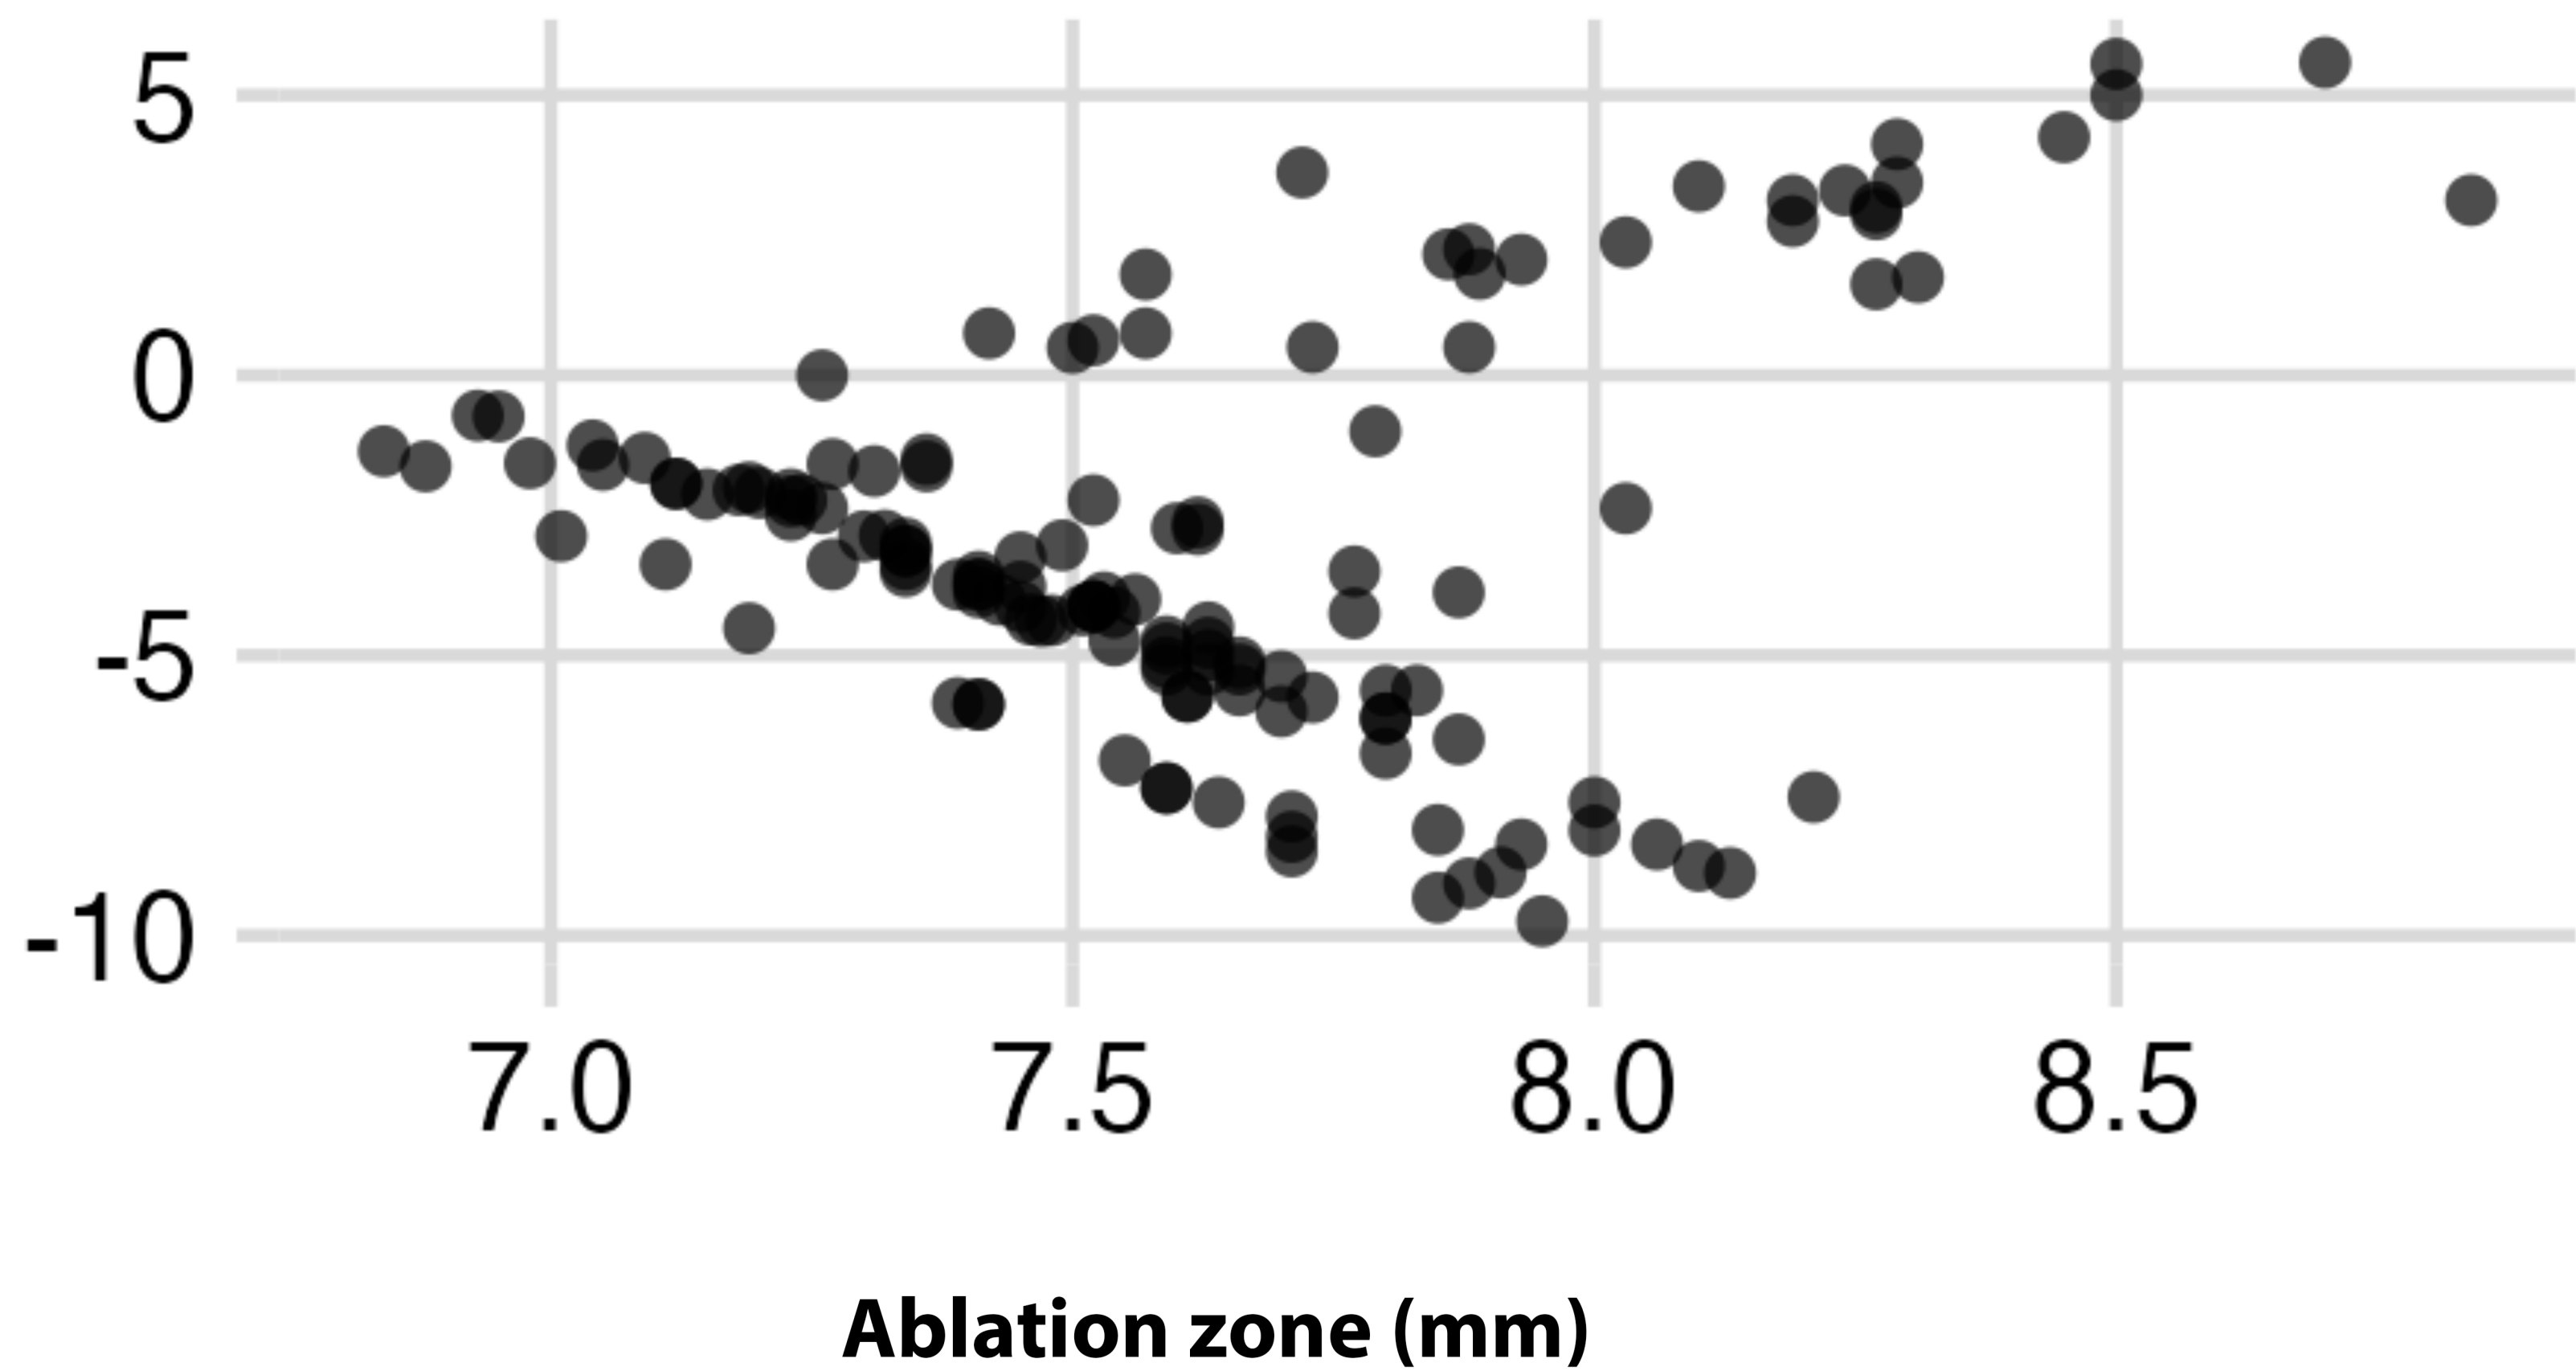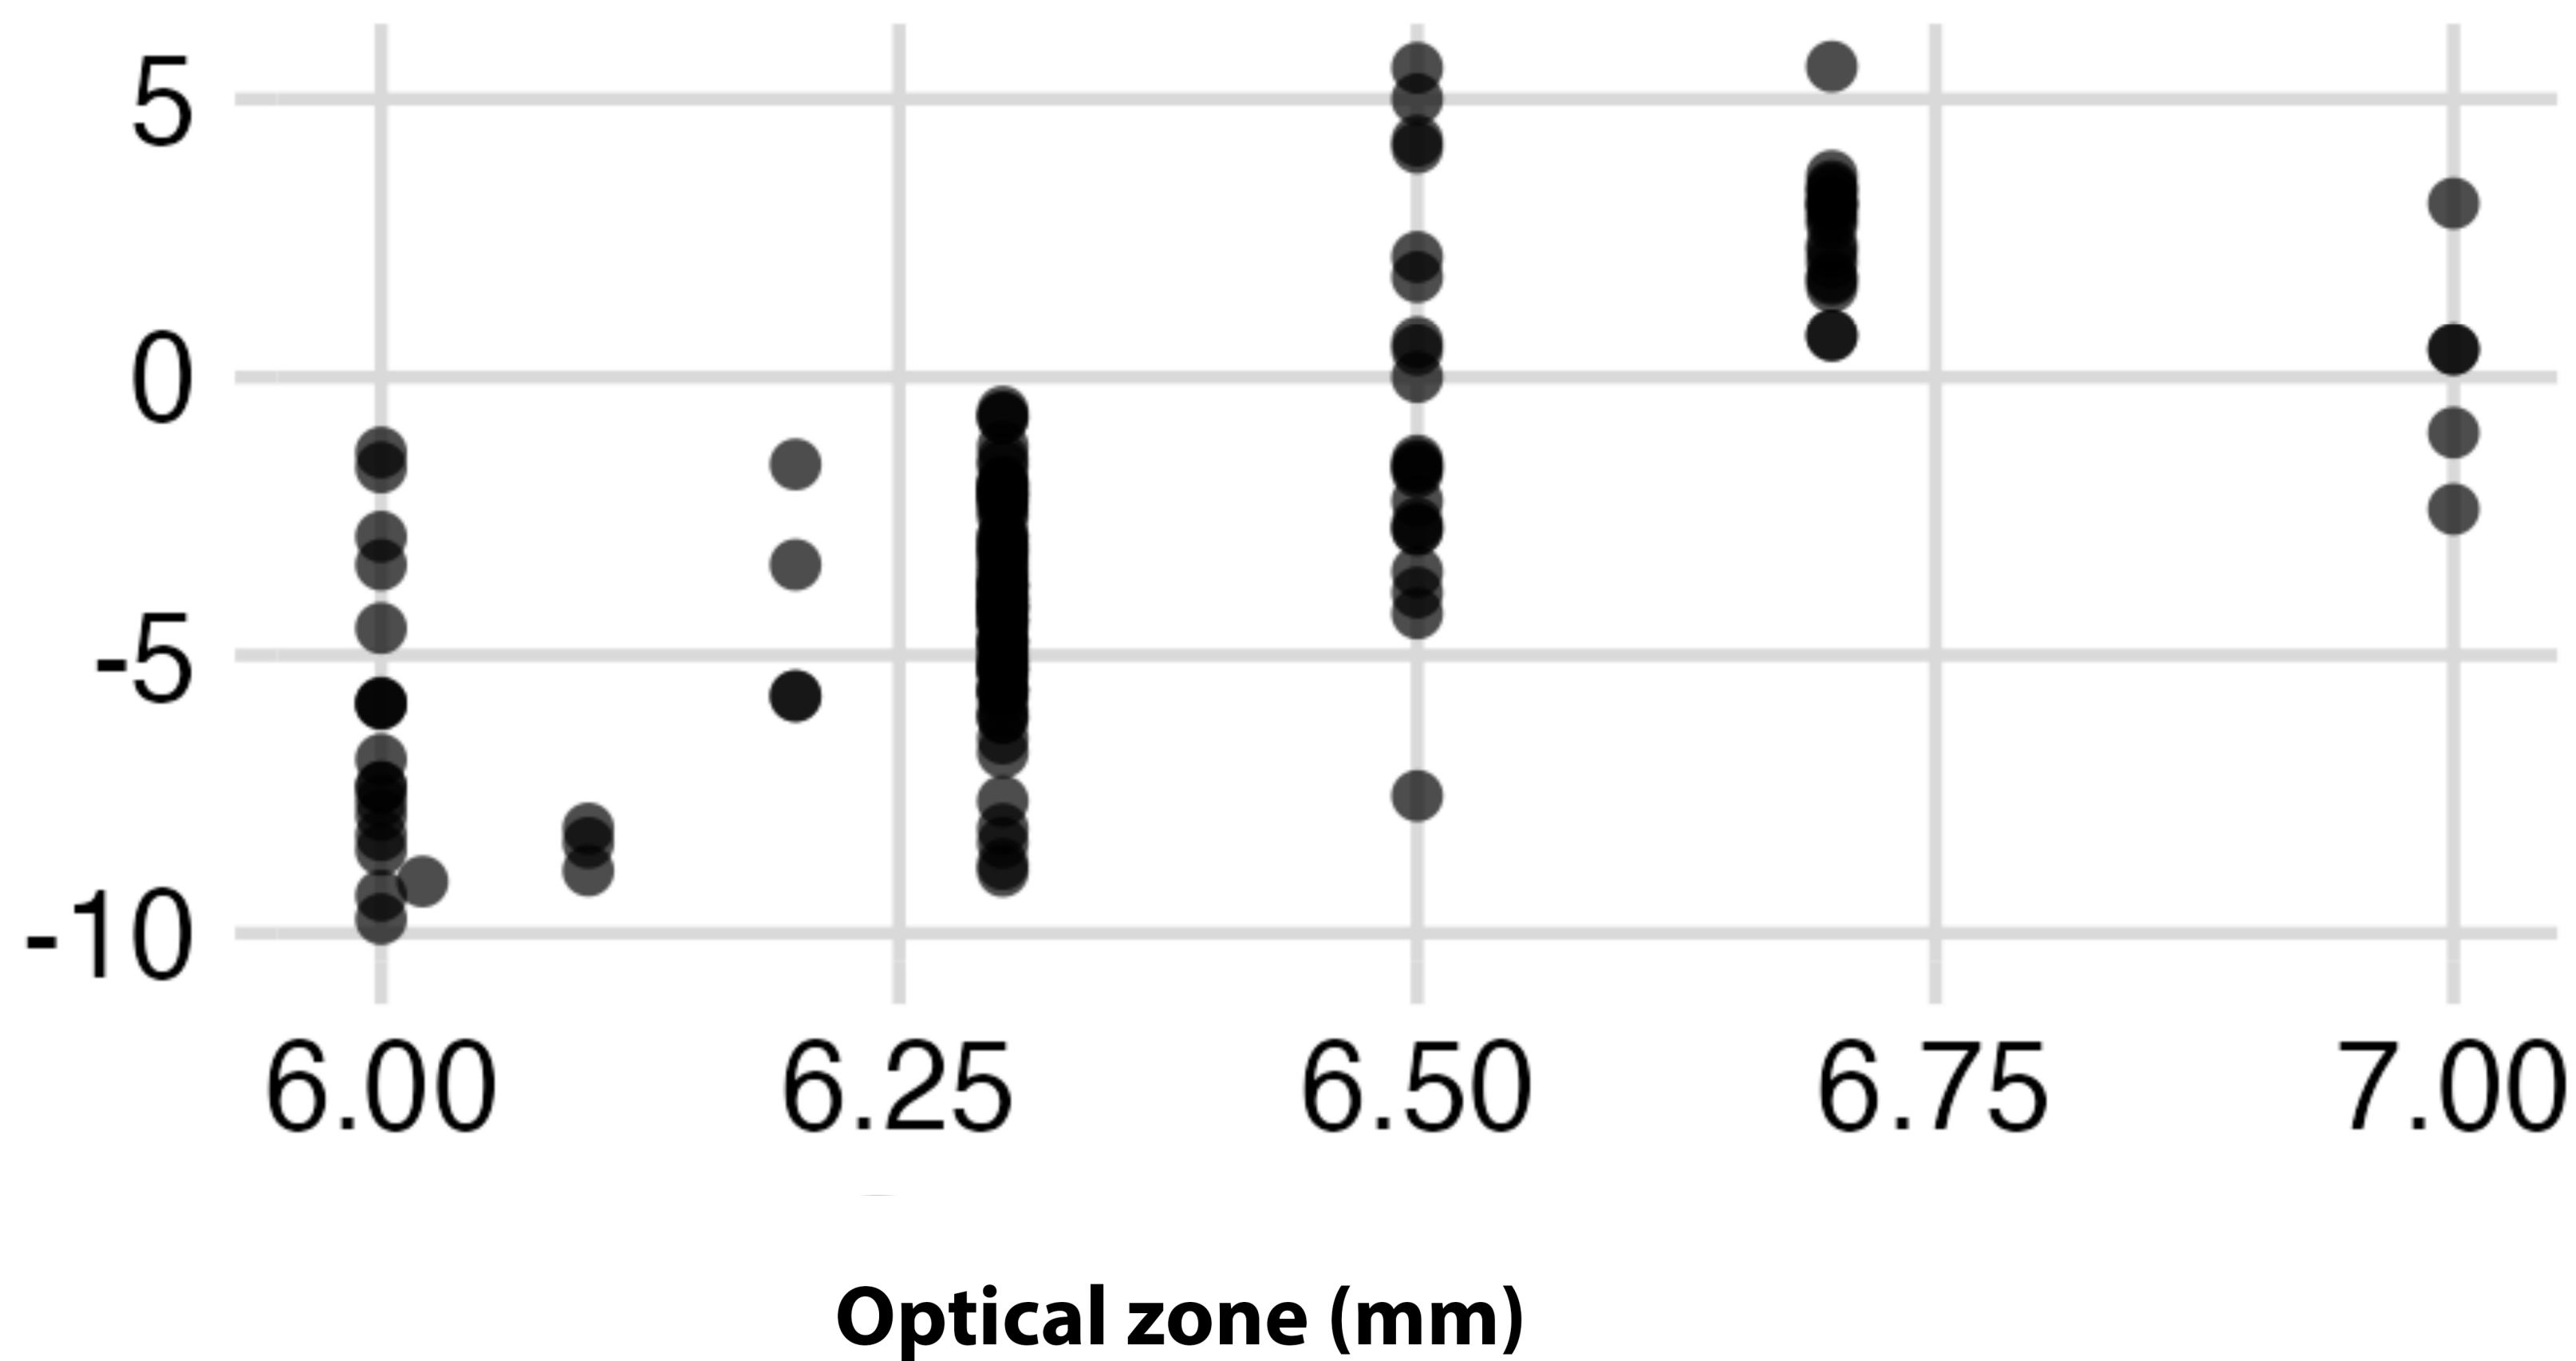

Supplement: f1 [file 2261831.f1.zip]
